# Supplementary material
Source: PubMed Central journal article supplement (PMC6684448)
Supplement: NIHMS1532202-supplement-2.pdf [file NIHMS1532202-supplement-2.pdf]

**Supplementary Tables:**

**Supplemental table 1: Quantification of histone H4, H2A, H2B and H1 with imaging on fixed samples.**

H4 Data

| Pair # | Old GSC/GB | New GB/GSC |    | Old H4 SG1/SG1 | New H4 SG2/SG1 |
|--------|------------|------------|----|----------------|----------------|
| 1      | 3.95261    | 0.58145    | 1  | 1.01           | 0.92           |
| 2      | 3.22532    | 0.85939    | 2  | 1.03           | 0.92           |
| 3      | 3.04916    | 0.98102    | 3  | 0.85           | 0.82           |
| 4      | 2.95193    | 1.23534    | 4  | 1.05           | 1.17           |
| 5      | 3.41593    | 1.05703    | 5  | 1.03           | 0.83           |
| 6      | 5.70124    | 1.19769    | 6  | 1.31           | 0.77           |
| 7      | 4.86019    | 1.21894    | 7  | 0.76           | 1.05           |
| 8      | 2.44502    | 1.43429    | 8  | 1.03           | 1.22           |
| 9      | 1.01334    | 1.03873    | 9  | 1.069          | 0.98           |
| 10     | 3.15893    | 0.72547    | 10 | 0.92           | 0.84           |
| 11     | 4.84095    | 0.75232    | 11 | 1.038          | 1.05           |
| 12     | 5.66219    | 1.75663    | 12 | 0.89           | 1.22           |
| 13     | 3.21869    | 0.66236    | 13 | 1.026          | 0.98           |
| 14     | 4.3869     | 1.1402     | 14 | 0.76           | 0.84           |
| 15     | 4.31614    | 1.75219    | 15 | 1.04           | 1.05           |
| 16     | 3.65617    | 0.6908     | 16 | 0.925          | 0.94           |
| 17     | 0.90141    | 1.15683    | 17 | 1.02           | 0.82           |
| 18     | 0.76087    | 1.14976    | 18 | 0.76           | 0.95           |
| 19     | 3.6405     | 0.78695    | 19 | 1.04           | 0.872          |
| 20     | 3.8227     | 0.57026    | 20 | 0.925          | 1.202          |
| 21     | 1.33704    | 1.17069    | 21 | 1.02           | 1.147          |
| 22     | 4.53044    | 1.05605    | 22 | 1.016          | 0.8            |
| 23     | 2.92533    | 1.07775    | 23 | 0.99           | 1.12           |
| 24     | 3.08045    | 1.03266    | 24 | 1              | 1.03           |
| 25     | 0.94657    | 1.28723    | 25 | 1.02           | 0.68           |
| 26     | 4.87384    | 1.14928    | 26 | 1.123          | 1.38           |
| 27     | 5.97293    | 2.117      | 27 | 1.01           | 0.93           |
| 28     | 1.39878    | 0.81597    |    |                |                |
| 29     | 0.98925    | 0.98242    |    |                |                |

|    |         |         |  |  |  |
|----|---------|---------|--|--|--|
| 30 | 0.90328 | 0.80169 |  |  |  |
| 31 | 0.86818 | 1.39117 |  |  |  |
| 32 | 5.858   | 1.234   |  |  |  |
| 33 | 1.1098  | 1.3476  |  |  |  |
| 34 | 1.123   | 1.12    |  |  |  |
| 35 | 1.02    | 1.89202 |  |  |  |
| 36 | 1.12176 | 0.88736 |  |  |  |
| 37 | 1.32    | 0.98    |  |  |  |
| 38 | 1.39    | 1.01    |  |  |  |
| 39 | 1.87    | 1.38    |  |  |  |
| 40 | 0.98    | 1.05    |  |  |  |
| 41 | 0.99    | 1.25    |  |  |  |
| 42 | 1.8654  | 1.3453  |  |  |  |
| 43 | 2.261   | 1.35    |  |  |  |
| 44 | 2.56    | 1.11    |  |  |  |

H2A  
Data

| Pair # | Old H2A<br>GSC/GB | New H2A<br>GB/GSC | Pair # | Old H2A<br>SG1/SG2 | New H2A<br>SG2/SG1 |
|--------|-------------------|-------------------|--------|--------------------|--------------------|
| 1      | 0.97526           | 0.98053           | 1      | 1.08853            | 1.04377            |
| 2      | 0.96884           | 0.96606           | 2      | 1.01652            | 1.01619            |
| 3      | 0.96911           | 0.94179           | 3      | 0.94226            | 0.97414            |
| 4      | 1.23228           | 1.63322           | 4      | 1.06756            | 0.91538            |
| 5      | 1.02585           | 1.04176           | 5      | 1.0099             | 0.96247            |
| 6      | 1.05326           | 0.9991            | 6      | 1.04282            | 0.94673            |
| 7      | 0.96981           | 1.1862            | 7      | 1.01932            | 0.95029            |
| 8      | 0.79768           | 1.35798           | 8      | 1.22233            | 0.88543            |
| 9      | 1.07599           | 1.12273           | 9      | 0.99573            | 1.01997            |
| 10     | 1.12152           | 0.90102           | 10     | 0.93019            | 1.00929            |
| 11     | 1.06131           | 1.10325           | 11     | 0.93179            | 0.93155            |
| 12     | 0.9124            | 1.06645           | 12     | 0.98612            | 0.97988            |
| 13     | 0.80183           | 1.20448           | 13     | 0.92509            | 1.04502            |
| 14     | 1.07001           | 0.98794           | 14     | 1.01963            | 1.1036             |
| 15     | 0.72145           | 1.24709           | 15     | 1.03505            | 1.11993            |
| 16     | 1.33841           | 1.24652           | 16     | 0.96955            | 0.97257            |
| 17     | 0.89897           | 1.15451           | 17     | 0.97267            | 1.03535            |

|    |         |         |    |         |         |
|----|---------|---------|----|---------|---------|
| 18 | 1.15294 | 1.01967 | 18 | 1.02315 | 1.16413 |
| 19 | 1.05437 | 0.82361 | 19 | 0.97885 | 1.1532  |
| 20 | 0.92081 | 1.0273  | 20 | 1.05542 | 1.02936 |

H2B  
Data

| Pair # | Old H2B GSC/GB | New H2B GB/GSC | Pair # | Old H2B SG1/SG2 | New H2B SG2/SG1 |
|--------|----------------|----------------|--------|-----------------|-----------------|
| 1      | 0.81528        | 1.14988        | 1      | 1.0688          | 1.0368          |
| 2      | 0.91081        | 1.0871         | 2      | 0.83419         | 1.01759         |
| 3      | 0.99257        | 0.90021        | 3      | 1.01062         | 0.86112         |
| 4      | 0.97881        | 1.0615         | 4      | 1.04684         | 1.05203         |
| 5      | 1.17406        | 0.82182        | 5      | 0.91619         | 0.87483         |
| 6      | 0.87227        | 1.36065        | 6      | 0.97398         | 1.32672         |
| 7      | 1.16273        | 0.82736        | 7      | 1.22016         | 0.74991         |
| 8      | 1.17149        | 1.60111        | 8      | 1.00927         | 0.96835         |
| 9      | 1.03788        | 0.91736        | 9      | 0.9475          | 1.17024         |
| 10     | 0.99784        | 0.92363        | 10     | 0.85415         | 1.17491         |
| 11     | 0.89508        | 1.28192        | 11     | 1.17214         | 0.85816         |
| 12     | 0.9595         | 1.47957        | 12     | 1.0834          | 0.84516         |
| 13     | 1.23109        | 1.12747        | 13     | 1.07626         | 0.92324         |
| 14     | 0.8087         | 1.21191        | 14     | 1.02165         | 0.9204          |
| 15     | 1.04669        | 1.14397        | 15     | 0.86262         | 1.17237         |
| 16     | 0.84908        | 1.45383        | 16     | 1.02649         | 1.93949         |
| 17     | 1.05537        | 1.12127        | 17     | 1.02344         | 0.97242         |
| 18     | 1.01445        | 1.16539        | 18     | 0.92834         | 0.85676         |
| 19     | 0.9126         | 1.30627        | 19     | 0.90029         | 1.91883         |
| 20     | 1.02197        | 0.86291        | 20     | 1.06675         | 1.14407         |
| 21     | 1.20262        | 1.19143        | 21     | 1.09933         | 0.66265         |
| 22     | 0.88773        | 2.07111        | 22     | 1.15347         | 0.59781         |
| 23     | 0.9908         | 0.88569        | 23     | 0.98268         | 1.37432         |
| 24     | 0.91825        | 0.8915         | 24     | 0.8445          | 1.20599         |
| 25     | 0.91222        | 1.38431        | 25     | 1.03604         | 0.85231         |
| 26     | 0.86945        | 1.11417        | 26     | 1.06476         | 0.94824         |
| 27     | 1.1907         | 1.01954        | 27     | 0.88406         | 1.05915         |
| 28     | 0.89128        | 1.1297         | 28     | 1.09301         | 0.9983          |
| 29     | 1.04879        | 0.9498         | 29     | 1.08044         | 1.30052         |

|    |         |         |    |         |         |
|----|---------|---------|----|---------|---------|
| 30 | 1.21441 | 0.84858 | 30 | 1.22264 | 1.0443  |
| 31 | 0.93556 | 1.3278  | 31 | 1.03789 | 1.10251 |
| 32 | 0.84399 | 1.59379 | 32 | 1.12615 | 0.97758 |
| 33 | 1.01138 | 1.16682 | 33 | 0.81355 | 0.91765 |
| 34 | 0.90725 | 1.46625 | 34 | 1.08318 | 0.96847 |
| 35 | 0.89401 | 1.03343 | 35 | 0.90433 | 1.0319  |
| 36 | 1.11016 | 1.90552 | 36 | 1.01597 | 1.01317 |
| 37 | 0.91736 | 1.47624 |    |         |         |
| 38 | 0.96429 | 1.28084 |    |         |         |
| 39 | 0.97663 | 2.04853 |    |         |         |
| 40 | 0.9693  | 0.89053 |    |         |         |

H1  
Data

| Pair# | Old H1<br>GSC/GB | New H1<br>GB/GSC |
|-------|------------------|------------------|
| 1     | 1.23162          | 1.23631          |
| 2     | 1.31383          | 1.37178          |
| 3     | 1.28099          | 1.28898          |
| 4     | 2.6868           | 2.02088          |
| 5     | 1.2147           | 0.67617          |
| 6     | 0.96056          | 0.99023          |
| 7     | 1.14701          | 1.70528          |
| 8     | 1.62913          | 1.25233          |
| 9     | 0.67269          | 0.77294          |
| 10    | 0.84621          | 0.75771          |
| 11    | 1.22312          | 1.26967          |
| 12    | 0.90353          | 0.82814          |

**Table 2: Averages and 95% confidence intervals for all datasets**

H4 data summary:

| Data set (figure):             | Average | 95% Confidence<br>interval |
|--------------------------------|---------|----------------------------|
| H4-GFP GSC/GB ratio (Figure 1) | 2.73    | $2.24 \leq x \leq 3.23$    |

|                                                              |              |                         |
|--------------------------------------------------------------|--------------|-------------------------|
| H4-mKO GB/GSC ratio (Figure 1)                               | 1.13         | $1.03 \leq x \leq 1.22$ |
| H4-GFP SG1/SG2 ratio (Figure 1)                              | 0.99         | $0.94 \leq x \leq 1.03$ |
| H4-mKO SG2/SG1 (Figure 1)                                    | 0.98         | $0.92 \leq x \leq 1.05$ |
|                                                              |              |                         |
| H2A-GFP GSC/GB ratio (Figure 2)                              | 1.00         | $0.94 \leq x \leq 1.08$ |
| H2A-mKO GB/GSC ratio (Figure 2)                              | 1.10         | $1.02 \leq x \leq 1.19$ |
| H2A-GFP SG1/SG2 ratio (Figure 2)                             | 1.01         | $0.98 \leq x \leq 1.04$ |
| H2A-mKO SG2/SG1 ratio (Figure 2)                             | 1.01         | $0.98 \leq x \leq 1.05$ |
| H2B-GFP GSC/GB ratio (Figure 2)                              | 0.99         | $0.95 \leq x \leq 1.03$ |
| H2B-mKO GB/GSC ratio (Figure 2)                              | 1.21         | $1.11 \leq x \leq 1.31$ |
| H2B-GFP SG1/SG2 ratio (Figure 2)                             | 1.01         | $0.98 \leq x \leq 1.05$ |
| H2B-mKO SG2/SG1 (Figure 2)                                   | 1.05         | $0.96 \leq x \leq 1.14$ |
| H1-GFP GSC/GB ratio (Supplementary figure 1)                 | 1.26         | $0.93 \leq x \leq 1.59$ |
| H1-mKO GB/GSC ratio (Supplementary figure 1)                 | 1.18         | $0.92 \leq x \leq 1.44$ |
|                                                              |              |                         |
| 30-minute pulse of EdU incorporation length (Sup. fig. 2)    | 1.96 $\mu$ m | $1.63 \leq x \leq 2.30$ |
|                                                              |              |                         |
| Quantification of old H2A on sister chromatids (Figure 4)    | 1.36         | $1.29 \leq x \leq 1.44$ |
| Quantification of old H3 on sister chromatids (Figure 4)     | 2.41         | $2.03 \leq x \leq 2.79$ |
| Quantification of new H2A on sister chromatids (Figure 4)    | 1.24         | $1.13 \leq x \leq 1.36$ |
| Quantification of new H3 on sister chromatids (Figure 4)     | 1.94         | $1.62 \leq x \leq 2.27$ |
|                                                              |              |                         |
| H3K27me3 fold-enrichment on RPA70-enriched sister (Figure 5) | 3.20         | $2.30 \leq x \leq 4.52$ |
| H3K27me3 fold-enrichment on PCNA-enriched sister (Figure 5)  | 2.04         | $1.60 \leq x \leq 2.50$ |

|                                                                |      |                         |
|----------------------------------------------------------------|------|-------------------------|
| H3K4me3 fold enrichment on RPA70 enriched sister               | 1.77 | $1.41 \leq x \leq 2.21$ |
|                                                                |      |                         |
| PLA puncta between ligase and new H3-mKO in GSCs (Figure 6)    | 26.5 | $23.0 \leq x \leq 30.0$ |
| PLA puncta between ligase and old H3-GFP in GSCs (Figure 6)    | 18.5 | $16.0 \leq x \leq 21.5$ |
| PLA puncta between ligase and new H3-mKO in SGs (Figure 6)     | 16.7 | $13.0 \leq x \leq 20.3$ |
| PLA puncta between ligase and old H3-GFP in SGs (Figure 6)     | 21.9 | $18.7 \leq x \leq 25.1$ |
| PLA puncta between PCNA and new H3-mKO in GSCs (Figure 6)      | 12.3 | $10.2 \leq x \leq 14.4$ |
| PLA puncta between PCNA and old H3-GFP in GSCs (Figure 6)      | 7.2  | $5.8 \leq x \leq 8.6$   |
| PLA puncta between PCNA and new H3-mKO in SGs (Figure 6)       | 8.3  | $7.0 \leq x \leq 9.7$   |
| PLA puncta between PCNA and old H3-GFP in SGs (Figure 6)       | 7.6  | $6.3 \leq x \leq 8.9$   |
| PLA puncta between ligase and old H3-mKO in GSCs (sup. fig. 4) | 8.5  | $6.1 \leq x \leq 10.9$  |
| PLA puncta between ligase and new H3-GFP in GSCs (sup. fig. 4) | 11.4 | $8.9 \leq x \leq 14.0$  |
| PLA puncta between old or new histones and Vasa (sup. fig. 4)  | 1.3  | $1.0 \leq x \leq 1.7$   |
| PLA puncta in hub cells in all experiments (sup. fig. 4)       | 0.2  | $0.1 \leq x \leq 0.3$   |
